# Supplementary material
Source: MDPI journal article supplement (https://www.mdpi.com/2311-7524/8/12/1097)
Supplement: s1 [file s1]

**Table S1.** Pearson correlation analyses of the relationships between soil physicochemical properties and enzyme activities.

| Enzyme activities    | TN            | TP           | TK           | Available nitrogen | Available phosphorus | Available potassium | Ammonium nitrogen | Nitrate nitrogen | pH           | SOC           | MBC   | DOC          | Bulk density   |
|----------------------|---------------|--------------|--------------|--------------------|----------------------|---------------------|-------------------|------------------|--------------|---------------|-------|--------------|----------------|
| Urease               | -0.11         | -0.23        | 0.14         | 0.19               | 0.35                 | 0.55                | <b>0.88**</b>     | 0.53             | 0.28         | 0.04          | 0.49  | 0.25         | 0.44           |
| Alkaline phosphatase | <b>0.60*</b>  | 0.50         | 0.55         | 0.57               | -0.11                | -0.16               | -0.12             | 0.12             | 0.49         | <b>0.92*</b>  | 0.54  | <b>0.65*</b> | <b>-0.66*</b>  |
| Sucrase              | <b>0.94**</b> | <b>0.60*</b> | <b>0.63*</b> | 0.19               | -0.22                | -0.08               | -0.15             | 0.24             | 0.35         | <b>0.69*</b>  | 0.37  | <b>0.63*</b> | -0.47          |
| Amylase              | 0.57          | 0.37         | 0.20         | 0.29               | -0.39                | -0.50               | -0.16             | -0.29            | 0.40         | <b>0.78**</b> | 0.27  | 0.56         | <b>-0.83**</b> |
| Ligninase            | 0.20          | 0.32         | -0.06        | -0.51              | <b>-0.62*</b>        | -0.37               | -0.06             | -0.09            | 0.32         | 0.20          | 0.34  | 0.44         | -0.32          |
| Cellulase            | -0.22         | -0.20        | -0.23        | 0.44               | 0.27                 | 0.05                | -0.23             | -0.02            | -0.19        | 0.03          | -0.38 | -0.18        | -0.07          |
| $\beta$ -Glucosidase | 0.24          | -0.17        | -0.42        | -0.41              | <b>-0.62*</b>        | -0.37               | 0.39              | -0.03            | <b>0.68*</b> | 0.28          | 0.05  | 0.48         | -0.46          |

Notes: TN, total nitrogen; TP, total phosphorus; TK, total potassium; SOC, soil organic carbon. MBC, Microbial biomass carbon; DOC, dissolved organic carbon. \* $p < 0.05$ ; \*\* $p < 0.01$ .

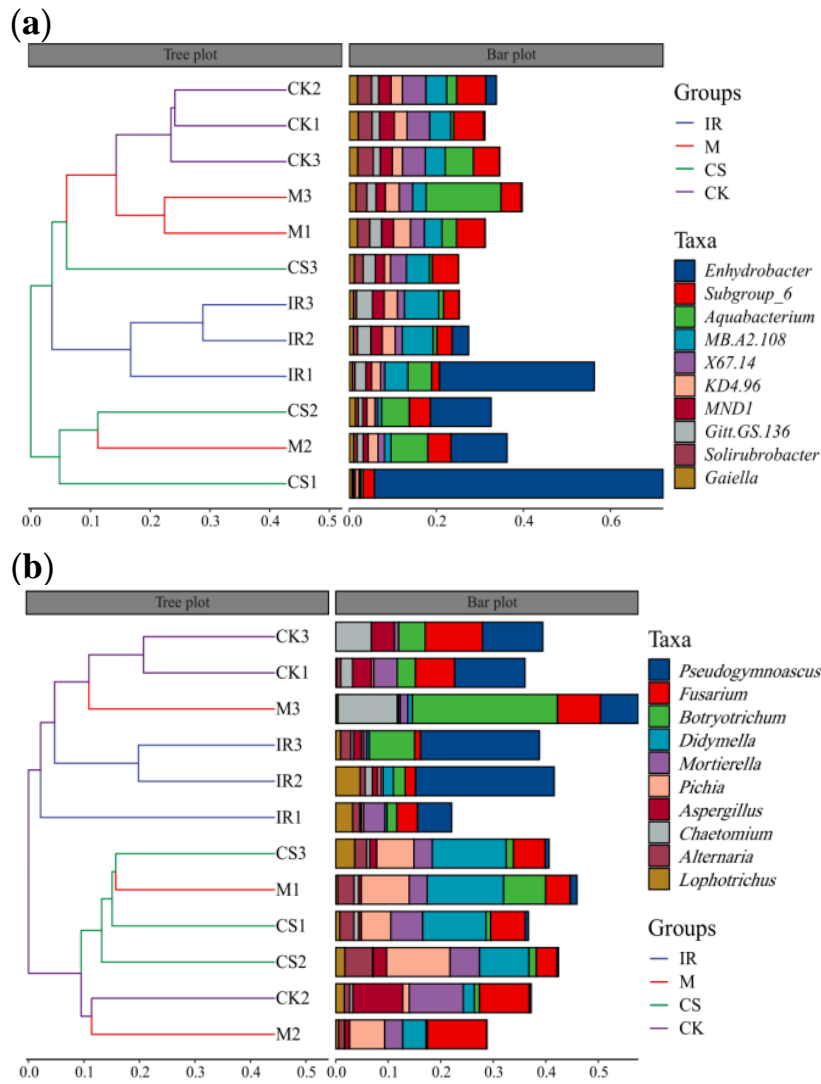

**Figure S1.** Hierarchical clustering analysis of soil bacterial and fungal communities associated with different sample plots. (a) Soil bacteria; (b) soil fungi. The left panel was a hierarchical clustering tree diagram, in which samples were clustered by their similarity. The shorter the branch length between samples, the more similar they were. The panel on the right was a stacked bar graph of the top 10 microorganisms by abundance at the genus level.
